# Supplementary material for: Reticular alignment: A progressive corner-cutting method for multiple sequence alignment
Source: Springer Nature journal article supplement (doi:10.1186/1471-2105-11-570), 2010-11-23
Supplement: 12859_2010_4153_MOESM10_ESM.pdf [file 12859_2010_4153_MOESM10_ESM.pdf]

: : \*\* \* : . : : \* . \* : \* :  
 1mmC TKPYRGHR-FTKENVRILESWFAKNIENPYLDTKGLENLMKNTSLSRIQIKNWVSNRR---RKEKTITIAPEL  
 1au7A RKRKR-RTTISIAAKDALERHFG---EHSKPSSQEIMRMAEELNLEKEVVRVWFCNRRQREKRVKT-SLNQSL  
 1akhA KSPKG-KSSISPQARAFLEEVFR---RKQSLNSKEKEEVAKKCGITPLQVRVWFINKRMRSK-----  
 1fj1A KQRRS-RTTFSASQLDELERAFE---RTQYPDIYTREELAQRTNLTEARIQVWFQNRRLARLRKQ----HTSVS  
 1ftt MRRKR-RVLFSQAQVYELERRFK---QQKYL SAPEREHLASMIHLTPTQVKIWFQNHRYKMKRQAK-DKAAQQ  
 1ftz MDSKRTRQTYTRYQTLELEKEFH---FNRYITRRRRIDIANALSLSERQIKIWFQNRMRKSKKDRTLDS SPEH

a)

: : : \*\* \* : . : : \* . \* : \* .  
 1mmC TKPYRGHR-FTKENVRI--LESWFAKNIENPYLDTKGLENLMKNTSLS--RIQIKNWVSNRR---RKEKTITIAPEL  
 1au7A RKRKR-RTTISIA-AK-DALERHFG-GEH-SKPS--SQEIMRMAEELNL-EKEV-VRVWFCNRRQR-EKRVKTSLNQSL  
 1akhA -KSPKGKSSIS-PQARAF-LEEVF-RRKQ--SLNSKEKEEVAKKCGITP--LQVRVWFINKRMRSK-----  
 1fj1A -KQRRSRTTFSASQ--LDELERAFER-TQYPDIYTR--EELAQRTNLTEARIQV--WFQNRRLARLRKQH--T-SVS-  
 1ftt MRRKR-RVLFS--QAQVYELERRF-KQK--YLSAPEREHLASMIHLTPT--QVKIWFQNHRYKMKRQAKDKAA-QQ  
 1ftz MDSKRTRQTYTRYQT-L-ELEKEFHFN-R--YITRRRRIDIANALSLSER--QIKIWFQNRMRKSKKDRTLDS SPEH

b)
