# Supplementary figures and images for: Reticular alignment: A progressive corner-cutting method for multiple sequence alignment
Source: Springer Nature journal article supplement (doi:10.1186/1471-2105-11-570), 2010-11-23

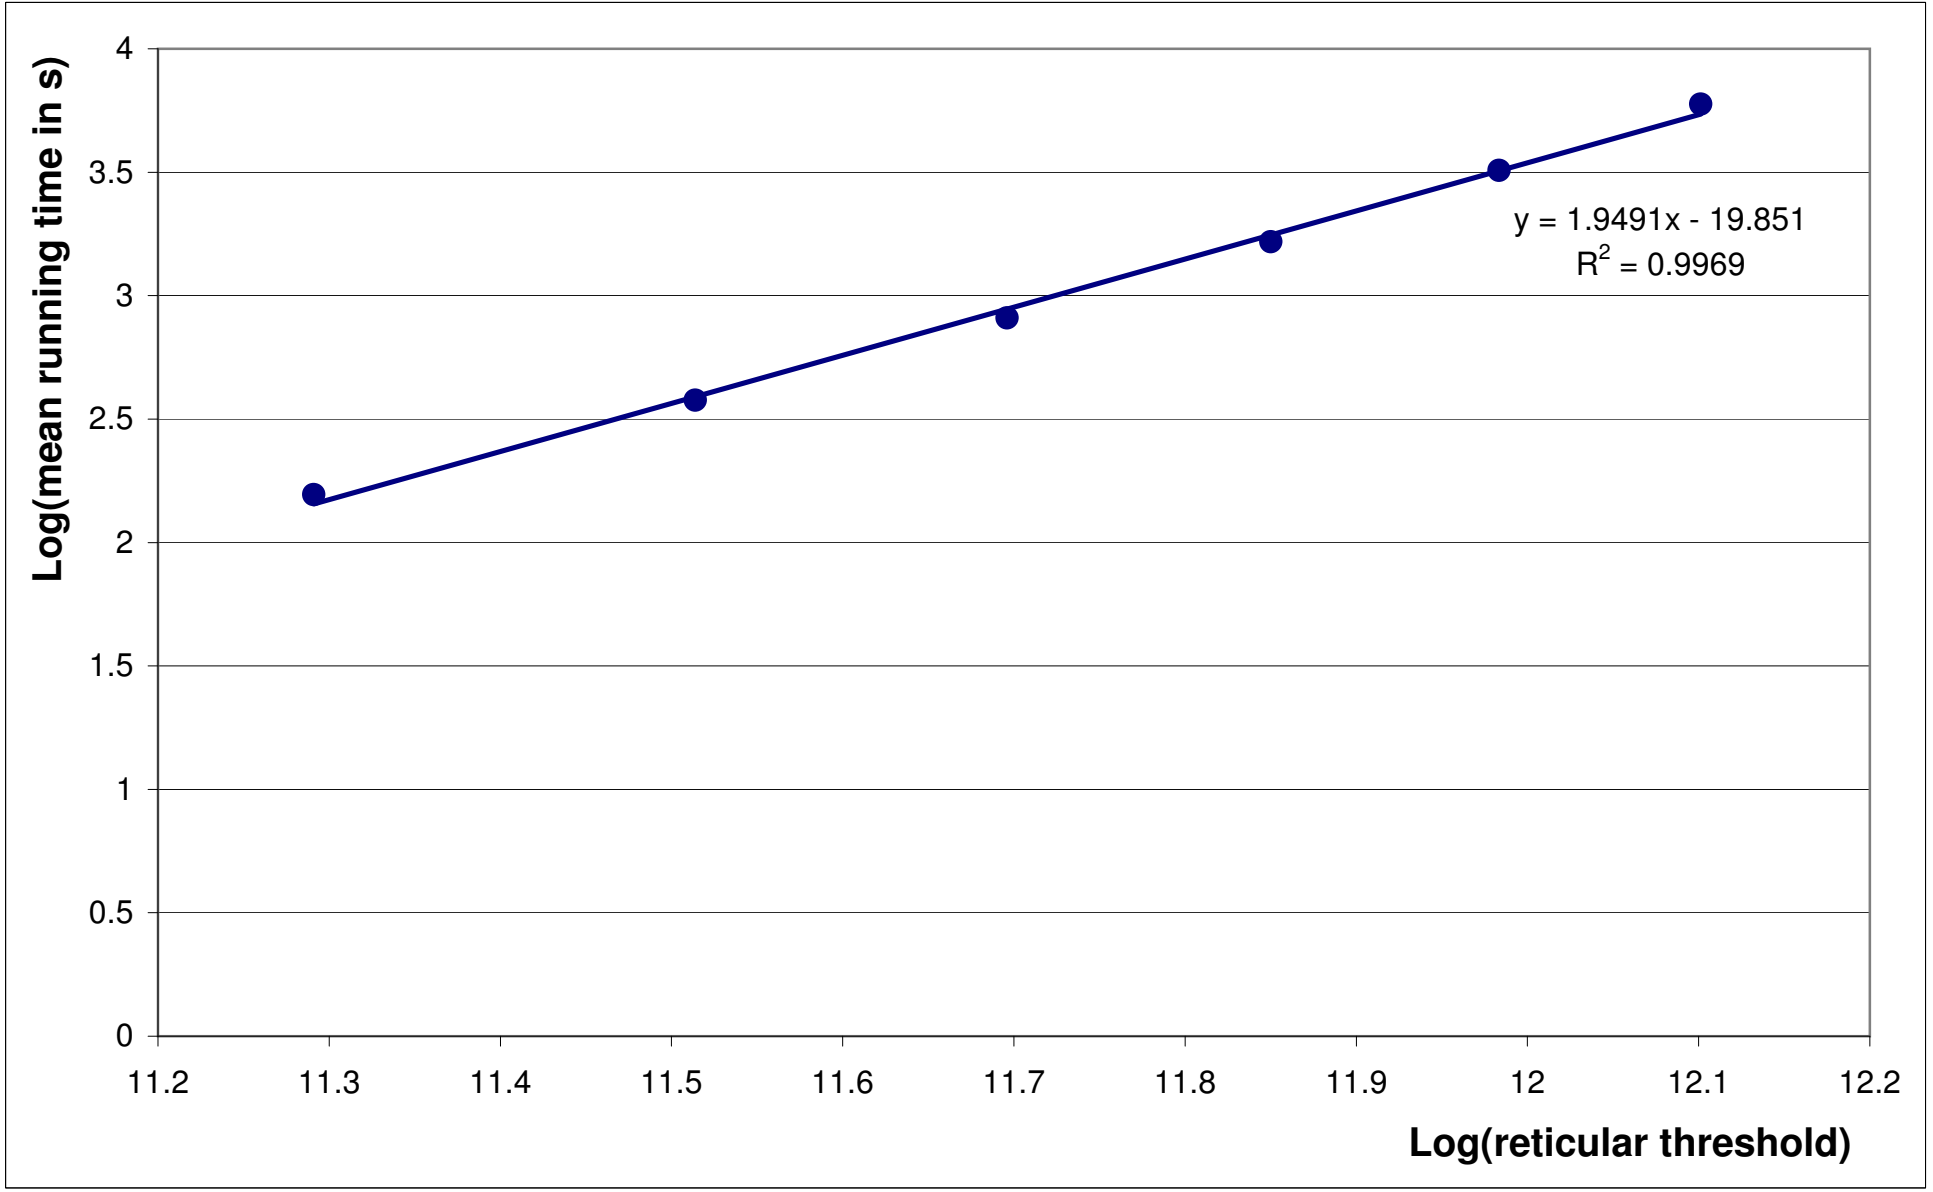

Supplement: 12859_2010_4153_MOESM11_ESM.pdf [file 12859_2010_4153_MOESM11_ESM.pdf]

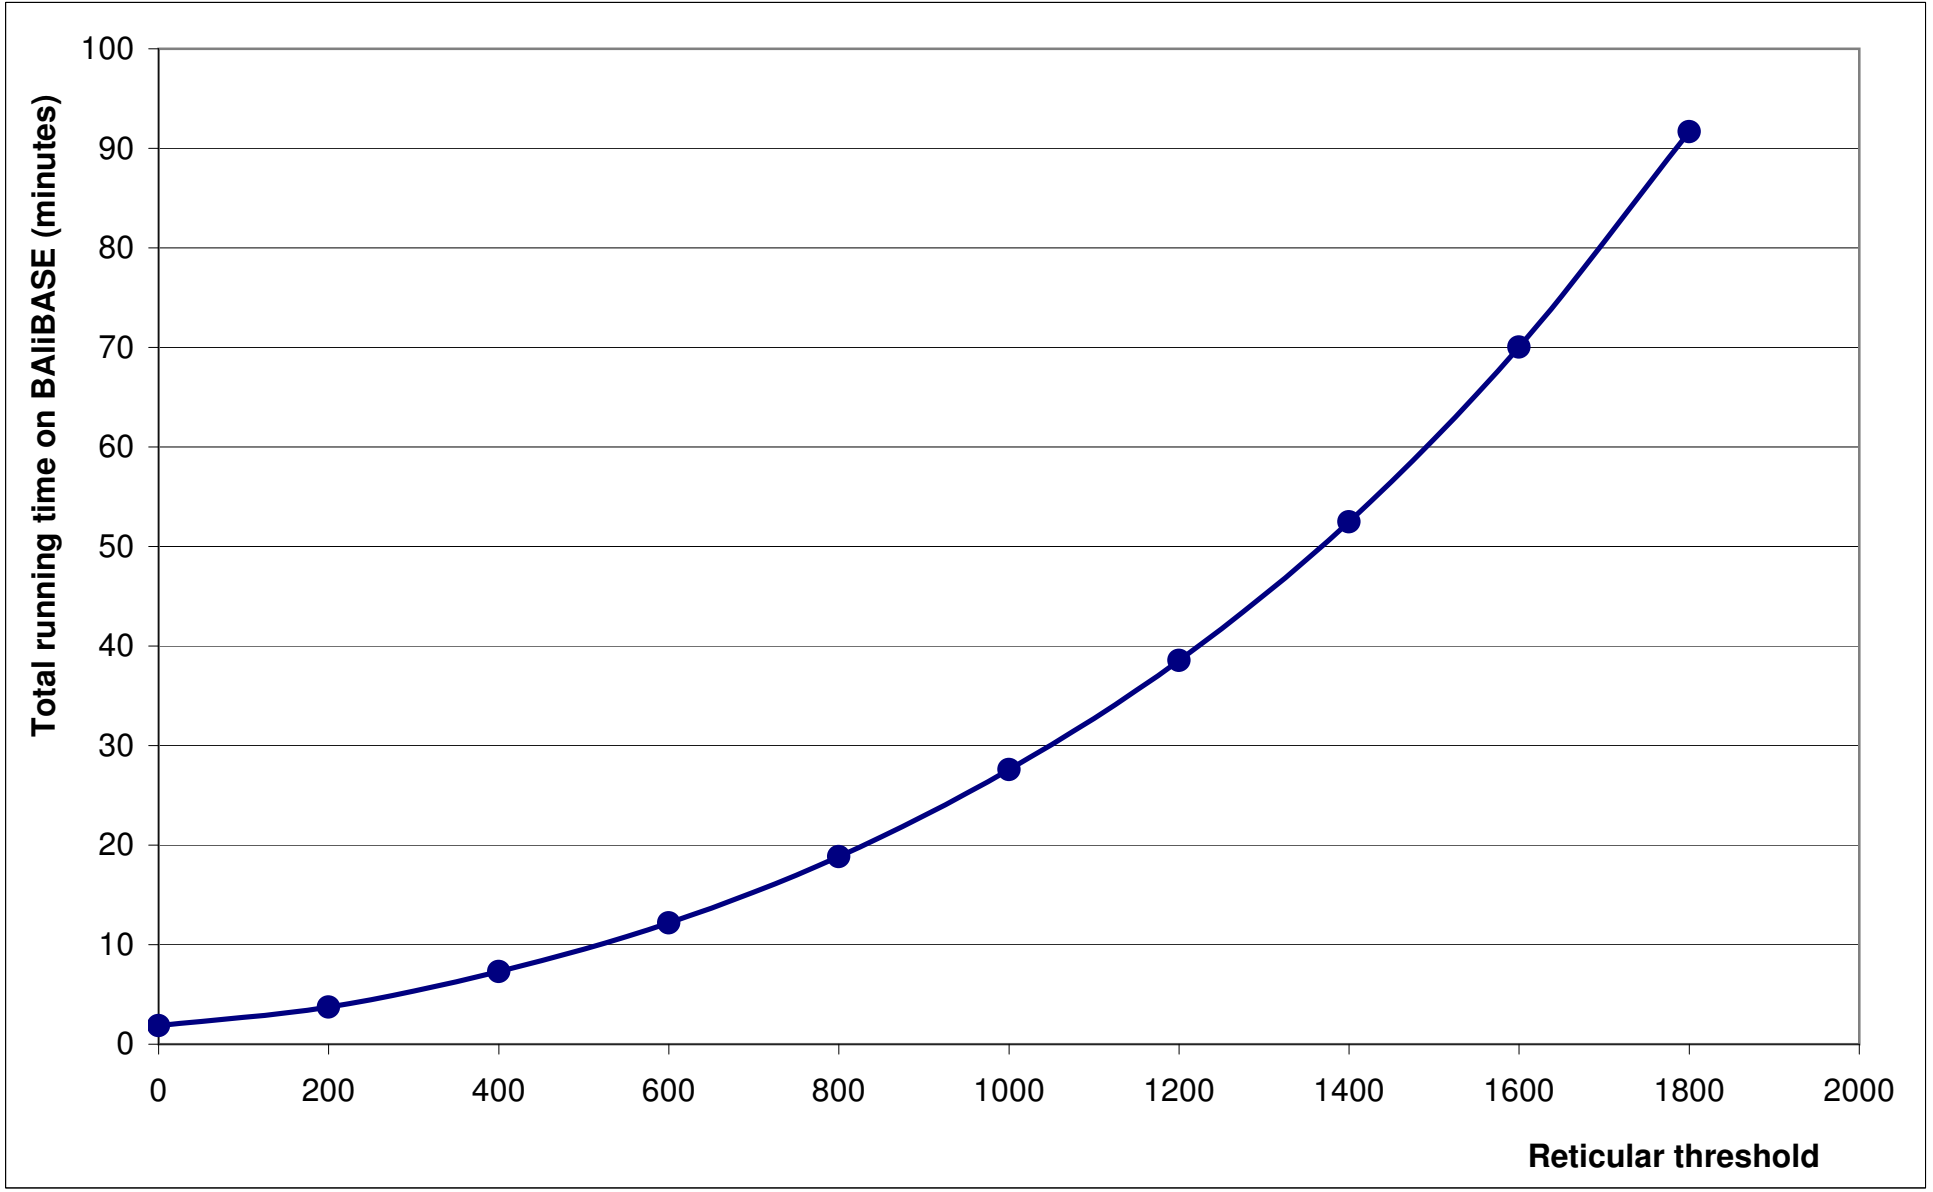

Supplement: 12859_2010_4153_MOESM12_ESM.pdf [file 12859_2010_4153_MOESM12_ESM.pdf]

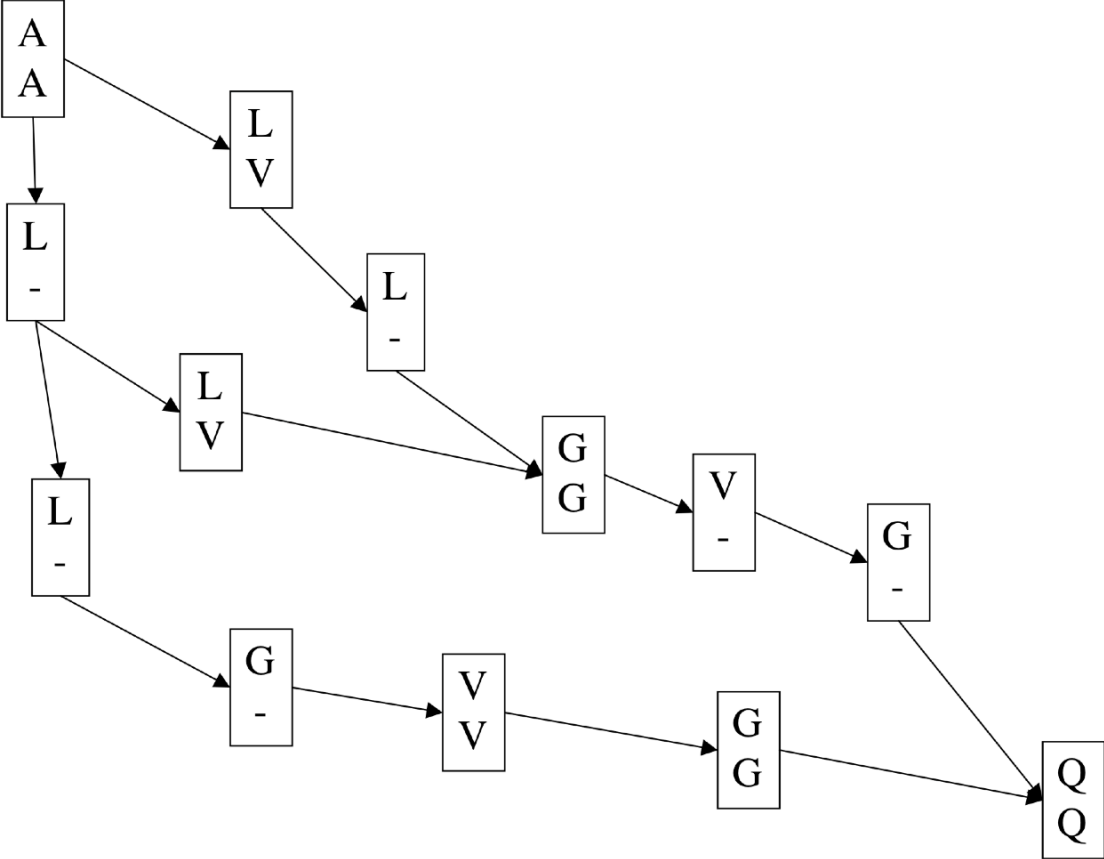

Supplement: 12859_2010_4153_MOESM1_ESM.pdf [file 12859_2010_4153_MOESM1_ESM.pdf]

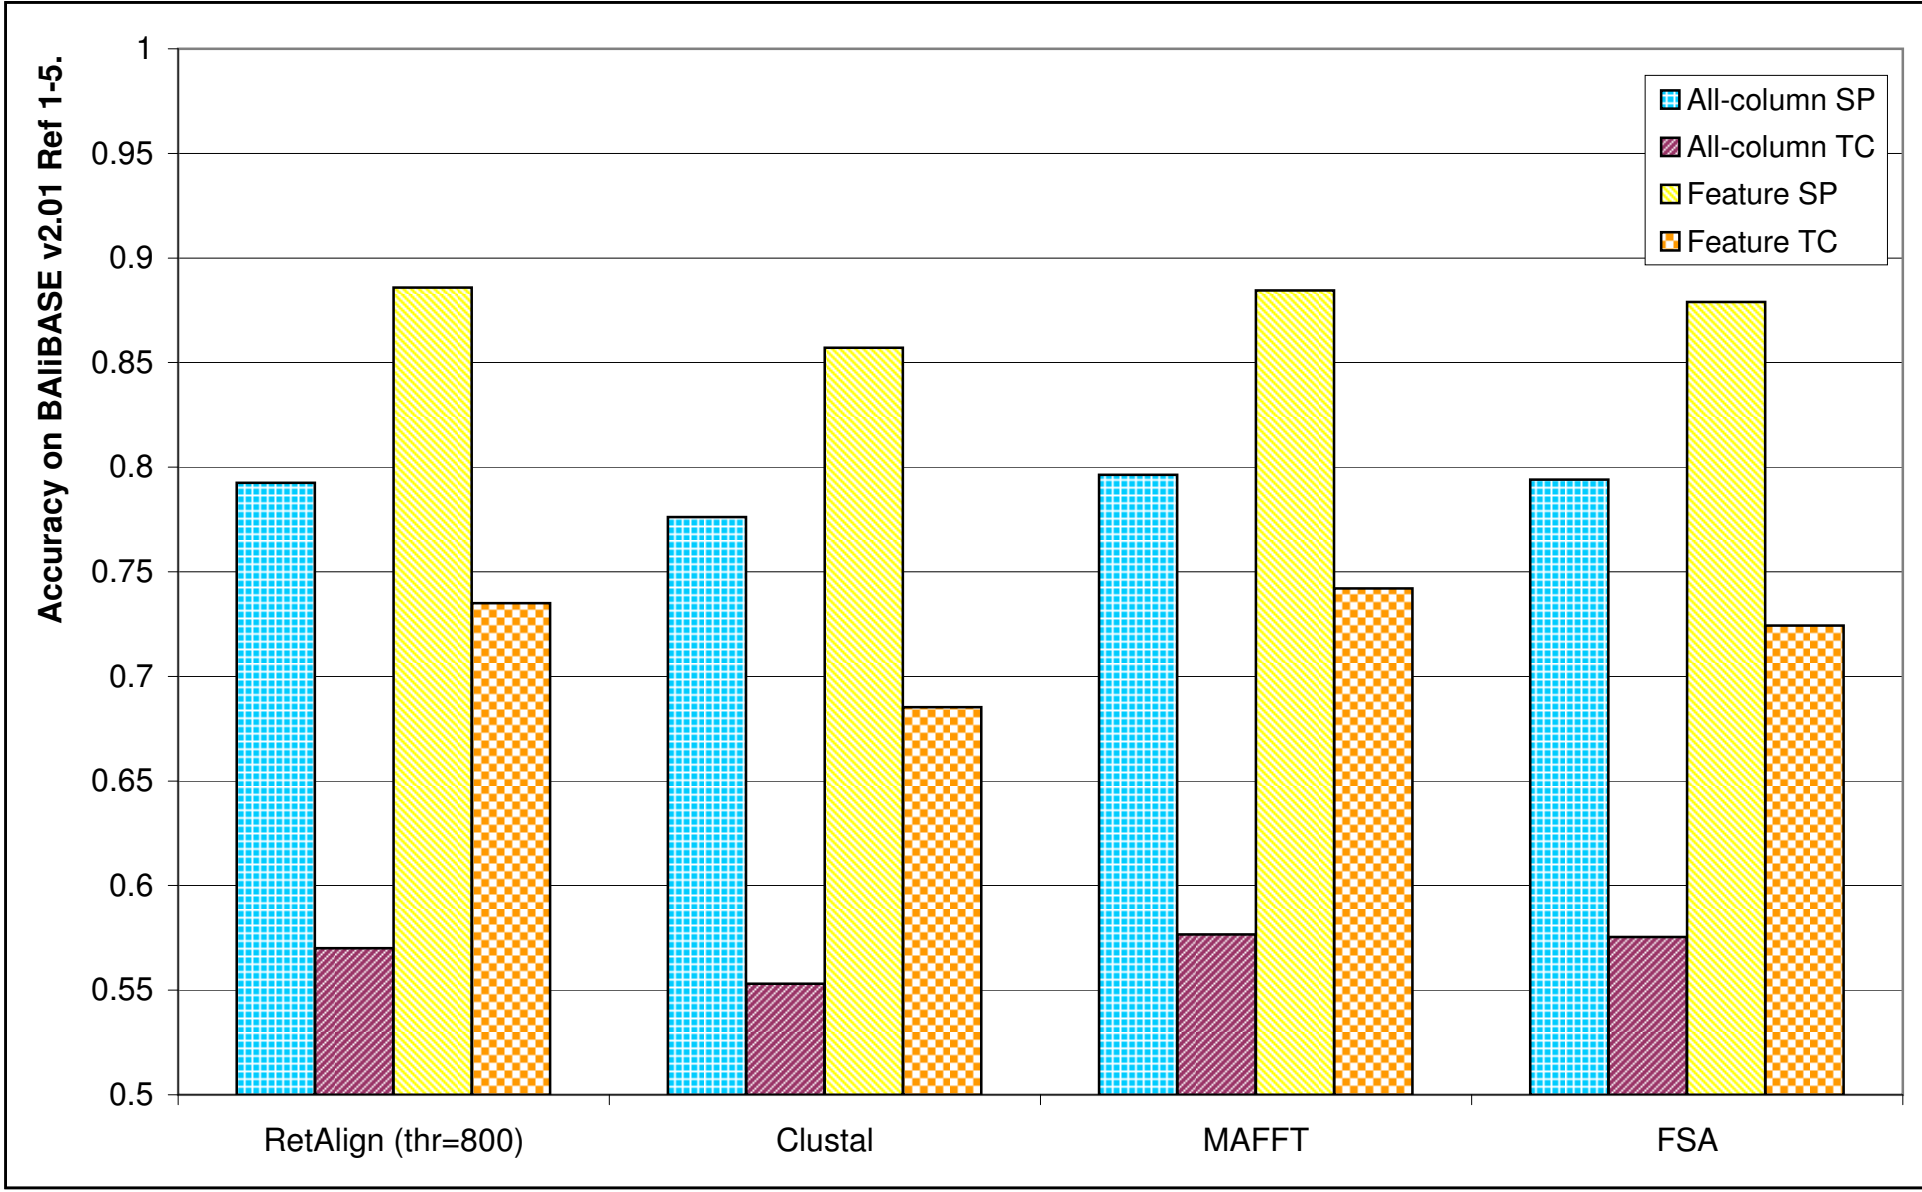

Supplement: 12859_2010_4153_MOESM2_ESM.pdf [file 12859_2010_4153_MOESM2_ESM.pdf]

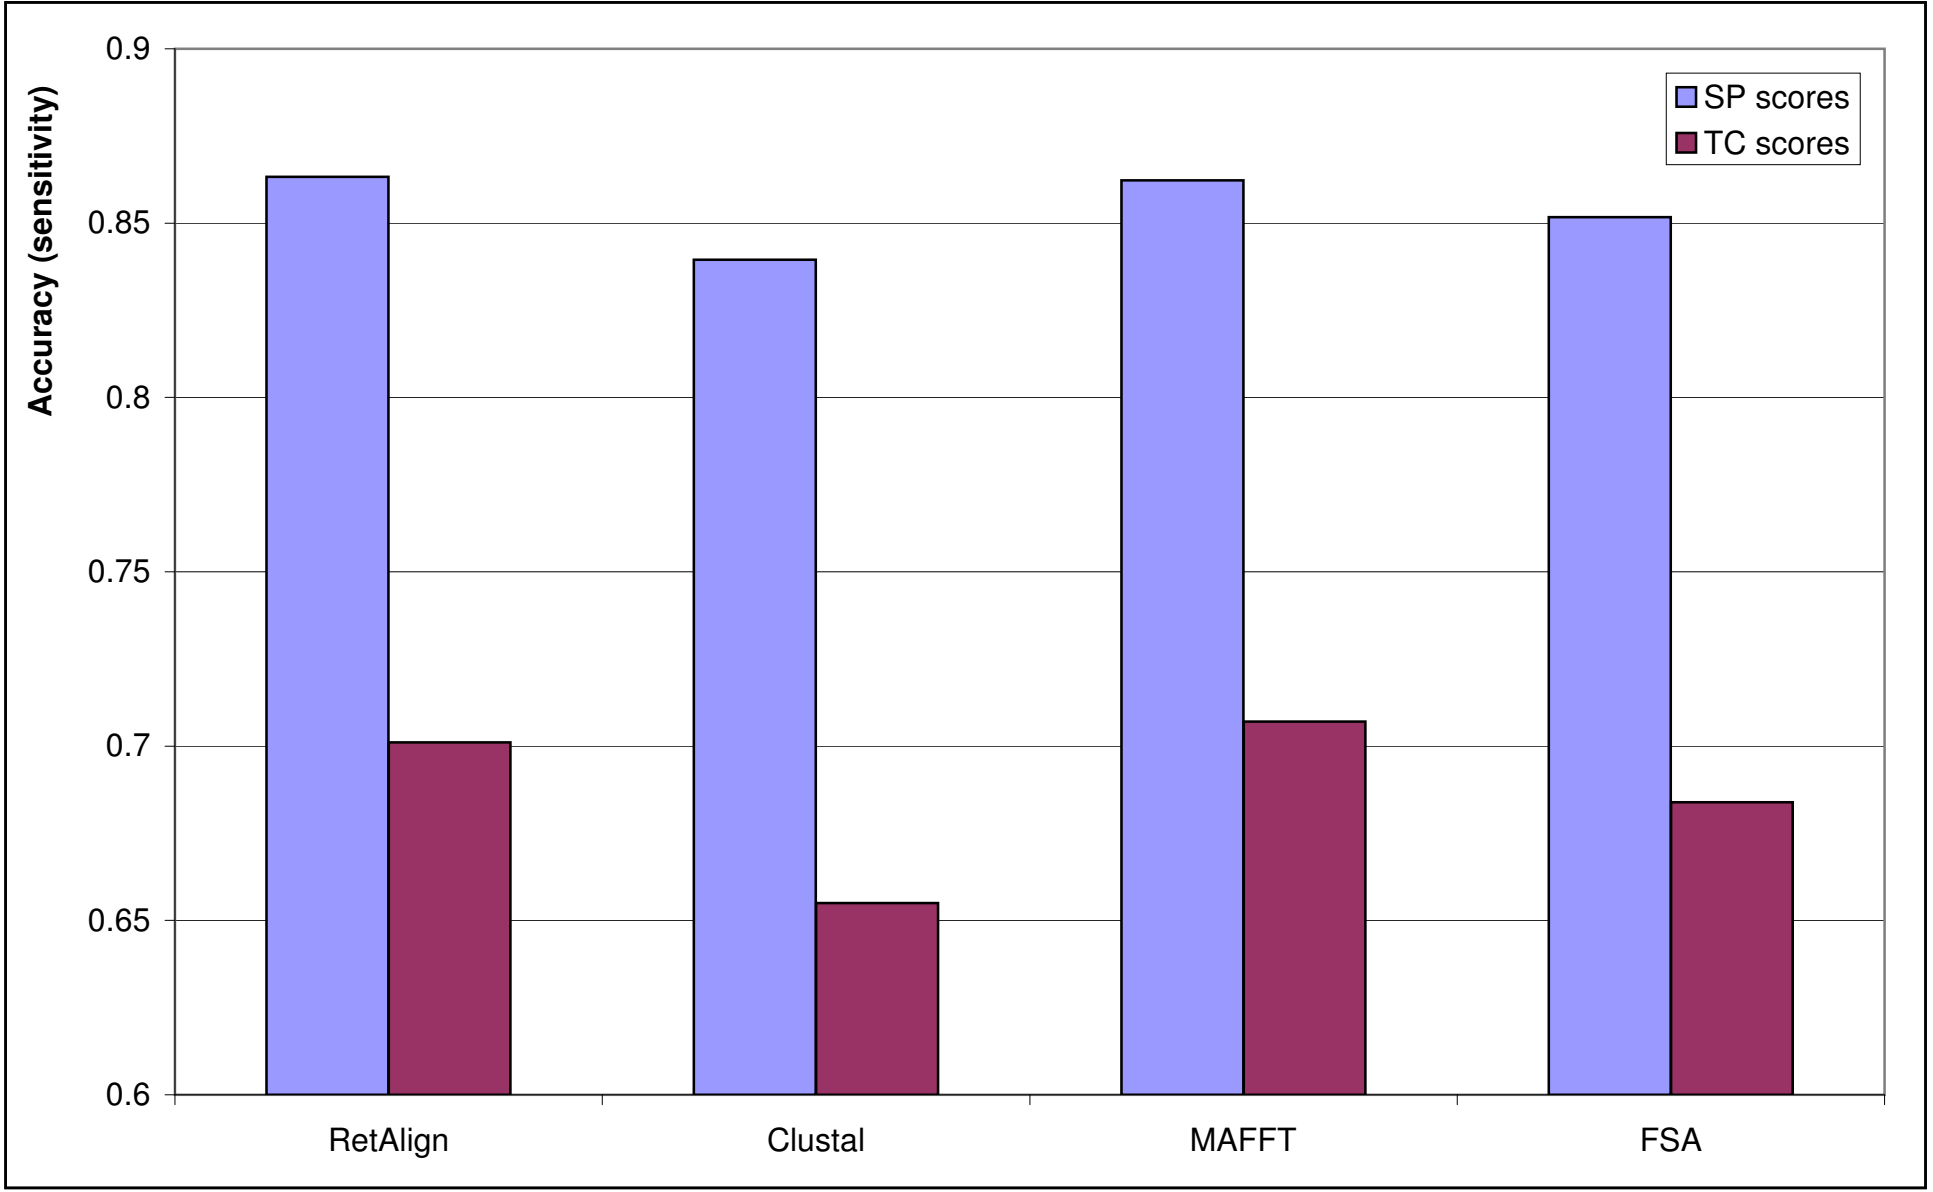

Supplement: 12859_2010_4153_MOESM3_ESM.pdf [file 12859_2010_4153_MOESM3_ESM.pdf]

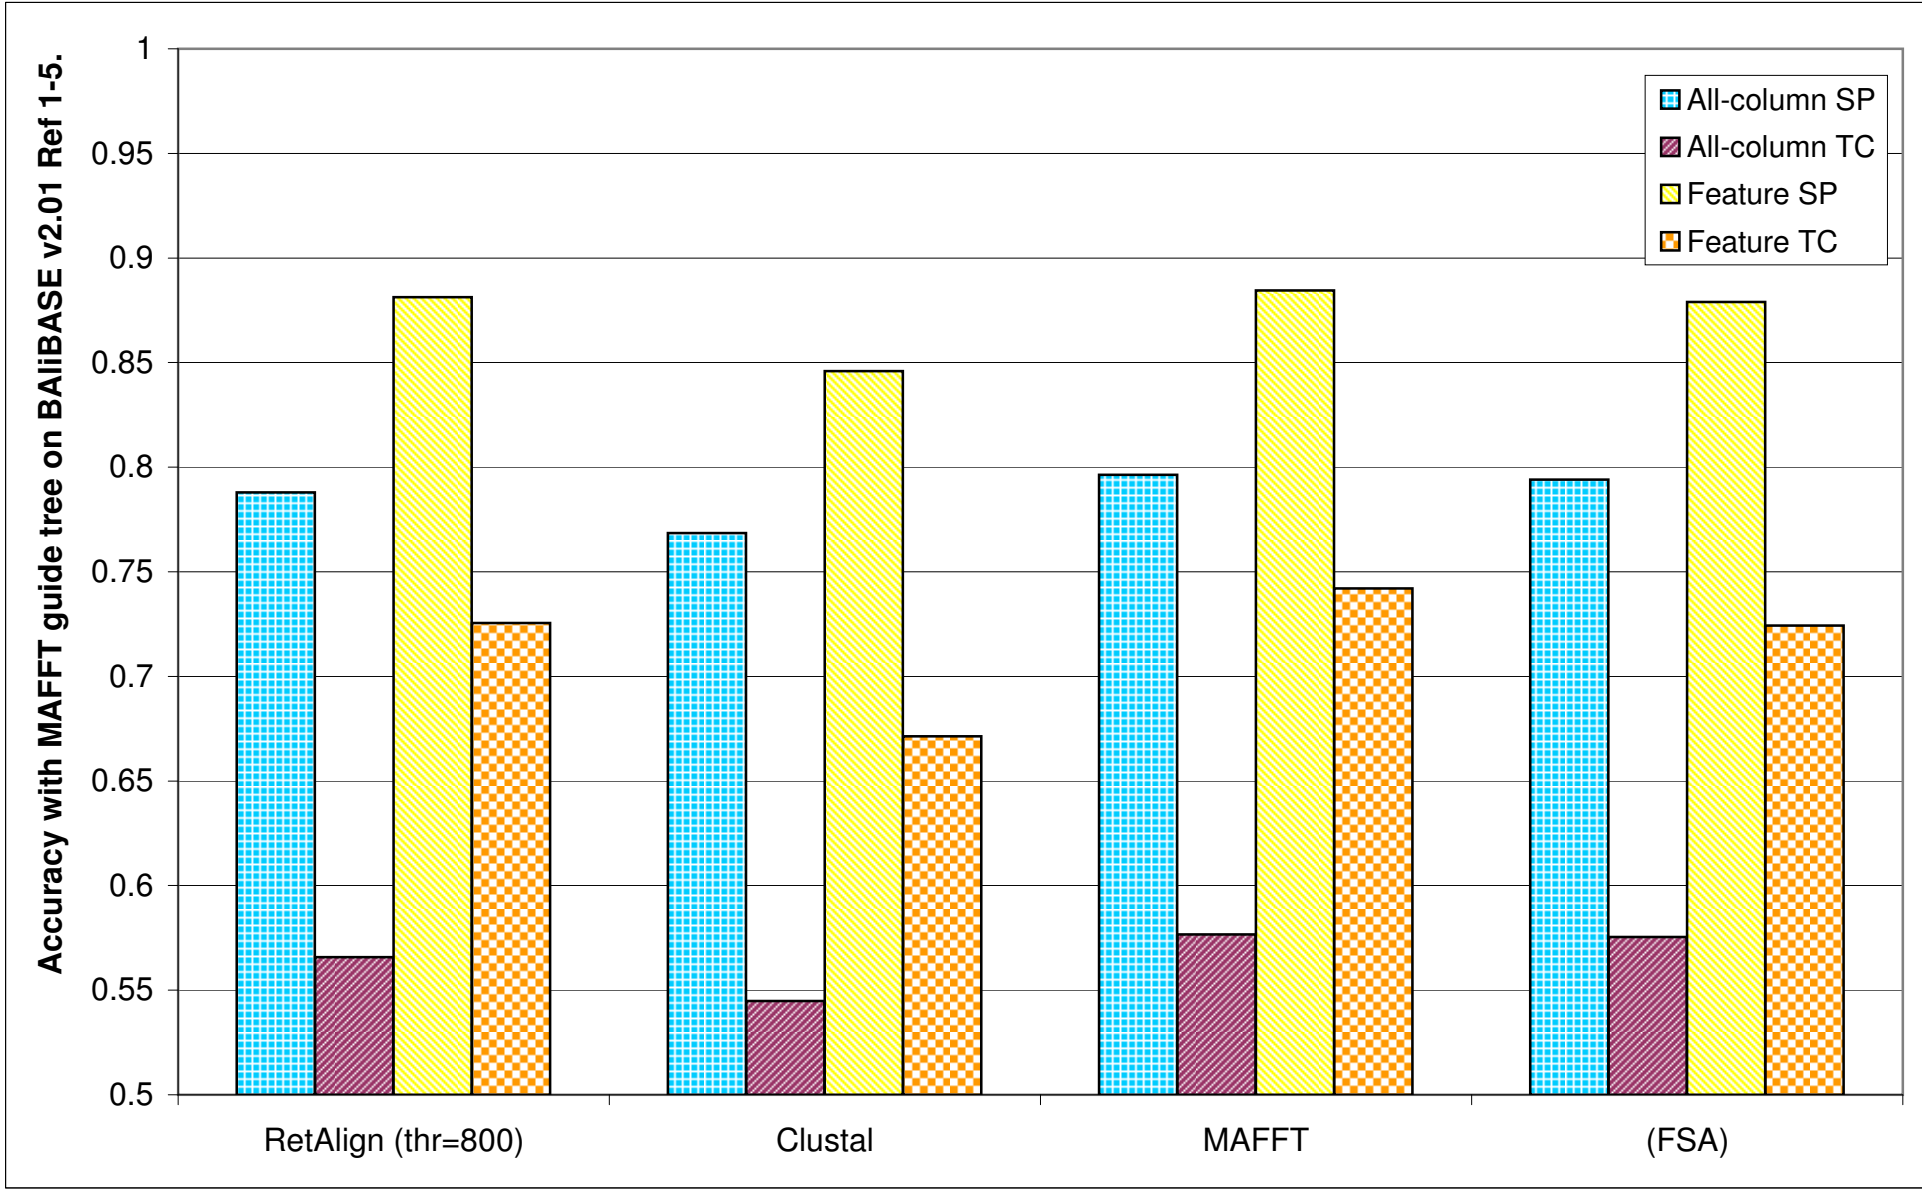

Supplement: 12859_2010_4153_MOESM4_ESM.pdf [file 12859_2010_4153_MOESM4_ESM.pdf]

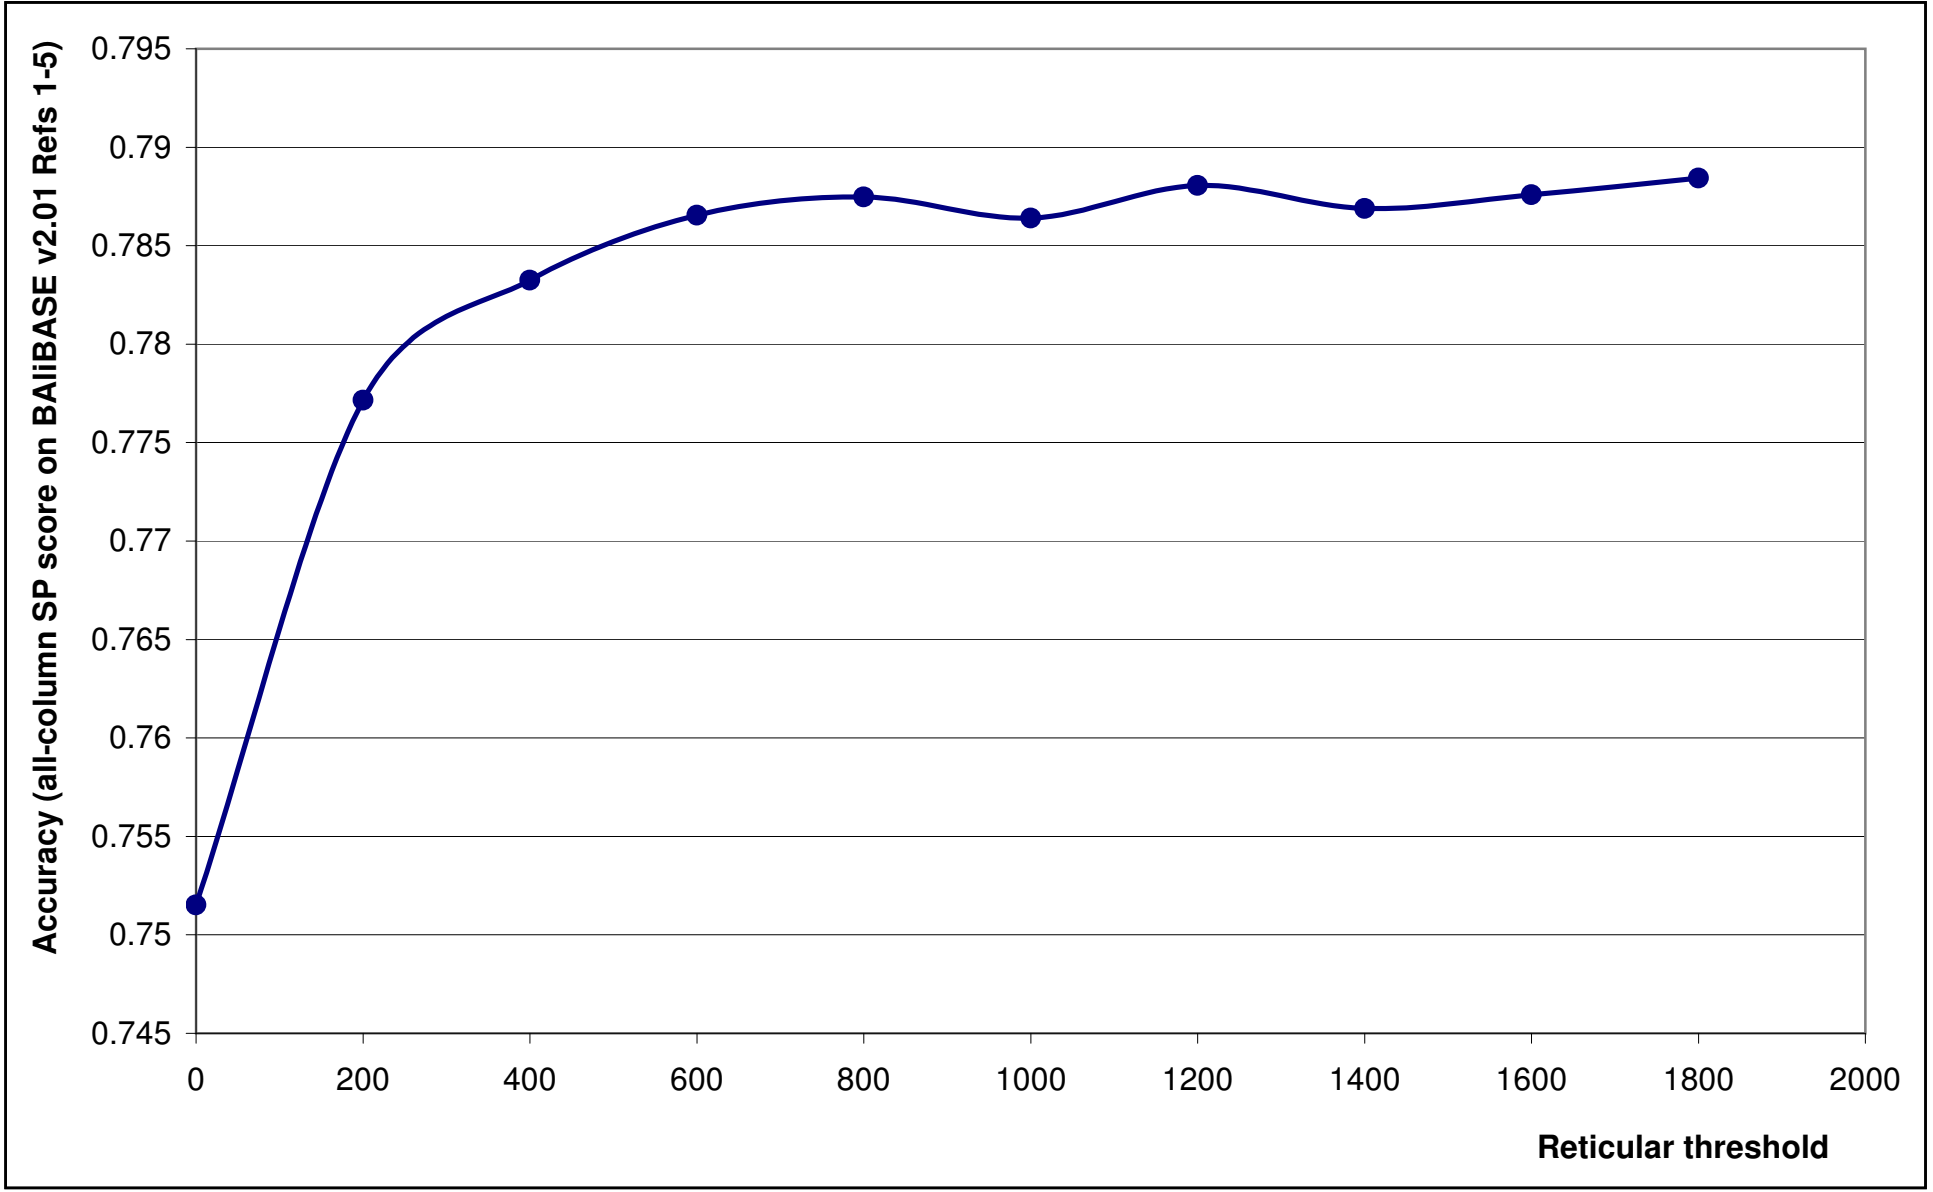

Supplement: 12859_2010_4153_MOESM5_ESM.pdf [file 12859_2010_4153_MOESM5_ESM.pdf]

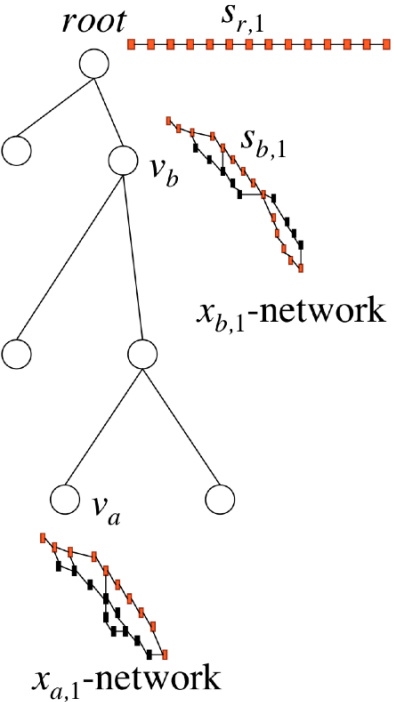

reticular treshhold:  $t_1$

$$s_{r,1} > s_{r,2}$$

$$s_{b,1} < s_{b,2} - x_{b,2}$$

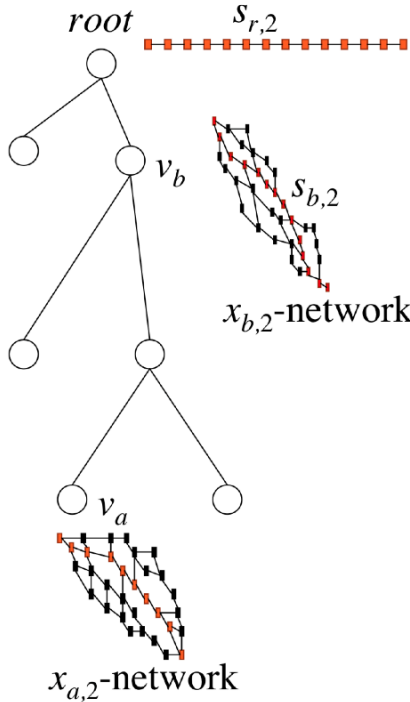

reticular treshhold:  $t_2$

Supplement: 12859_2010_4153_MOESM6_ESM.pdf [file 12859_2010_4153_MOESM6_ESM.pdf]

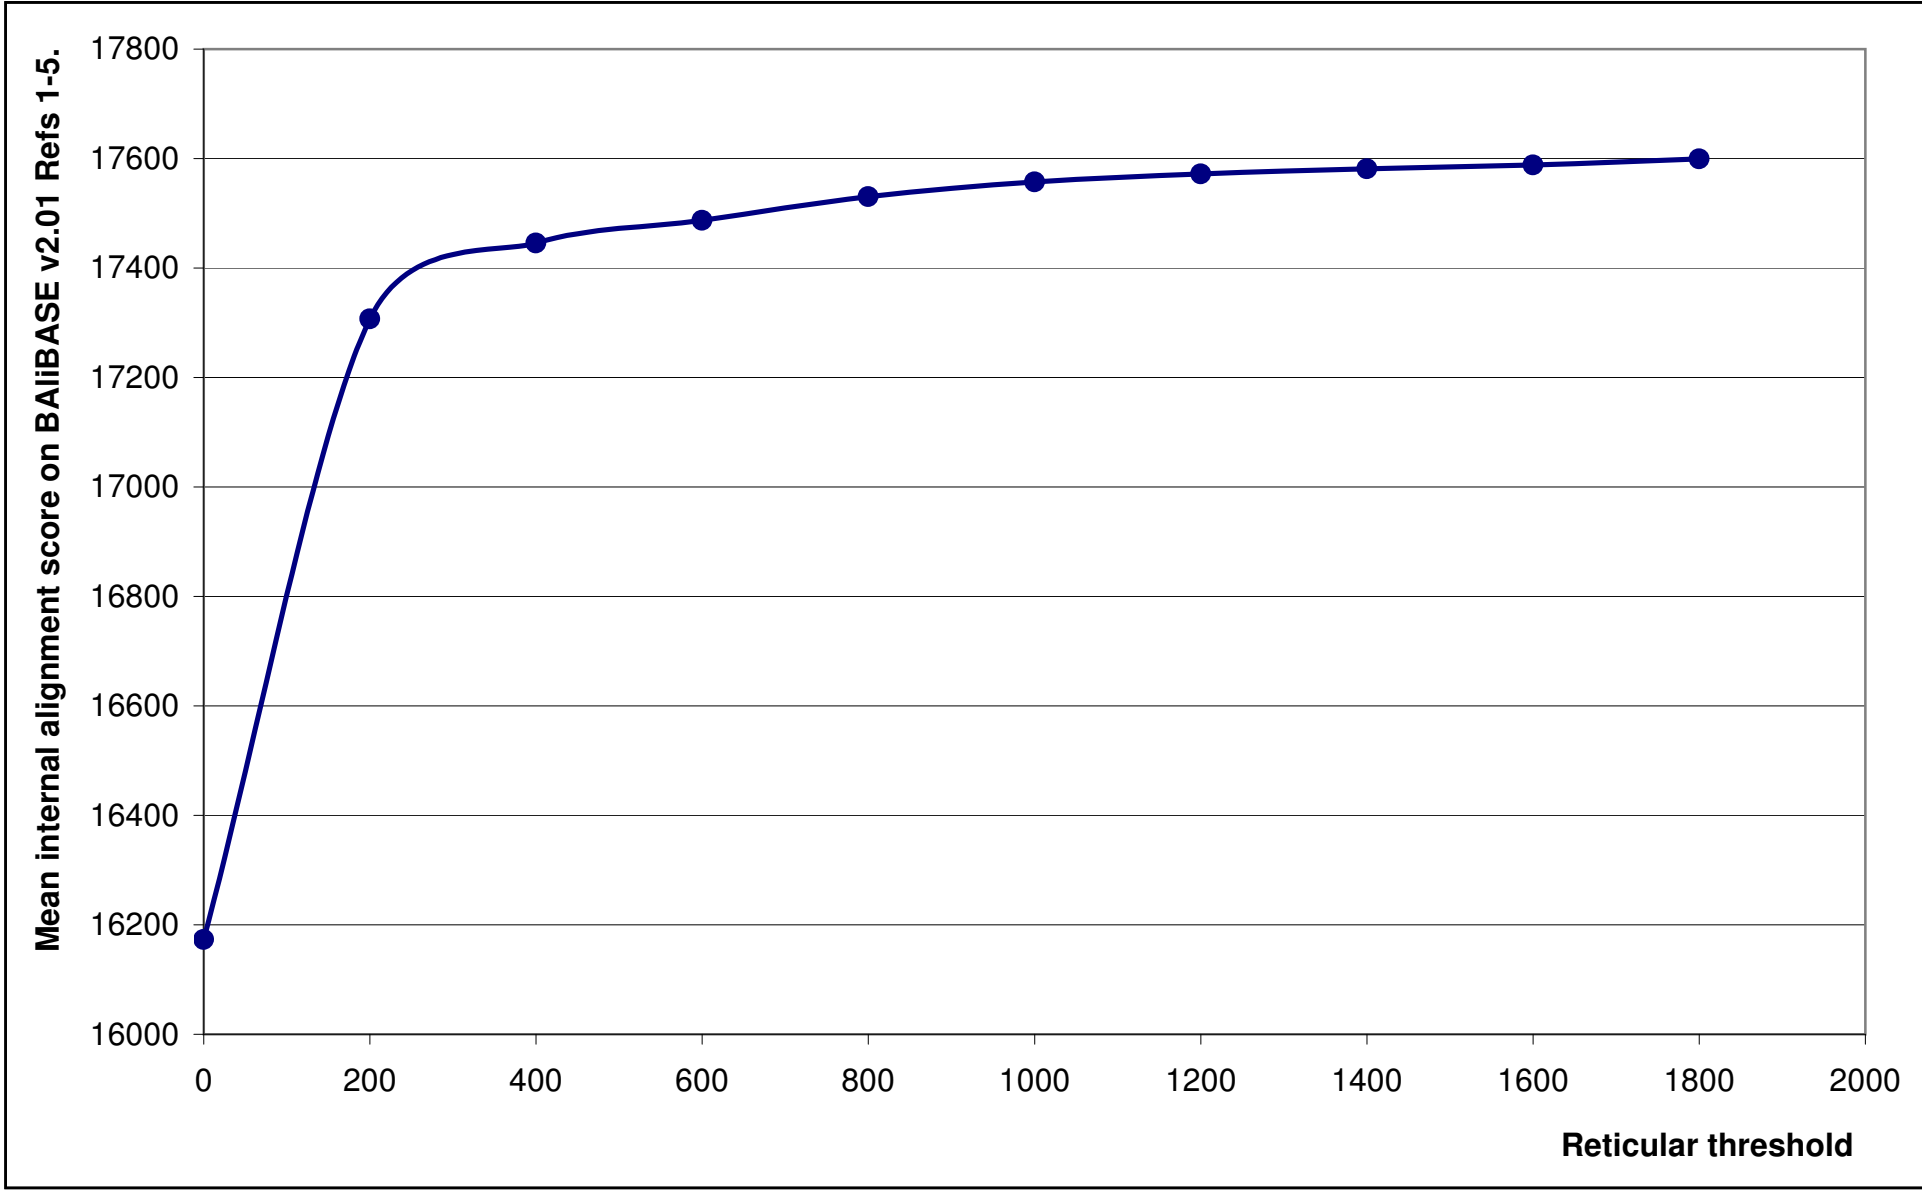

Supplement: 12859_2010_4153_MOESM7_ESM.pdf [file 12859_2010_4153_MOESM7_ESM.pdf]

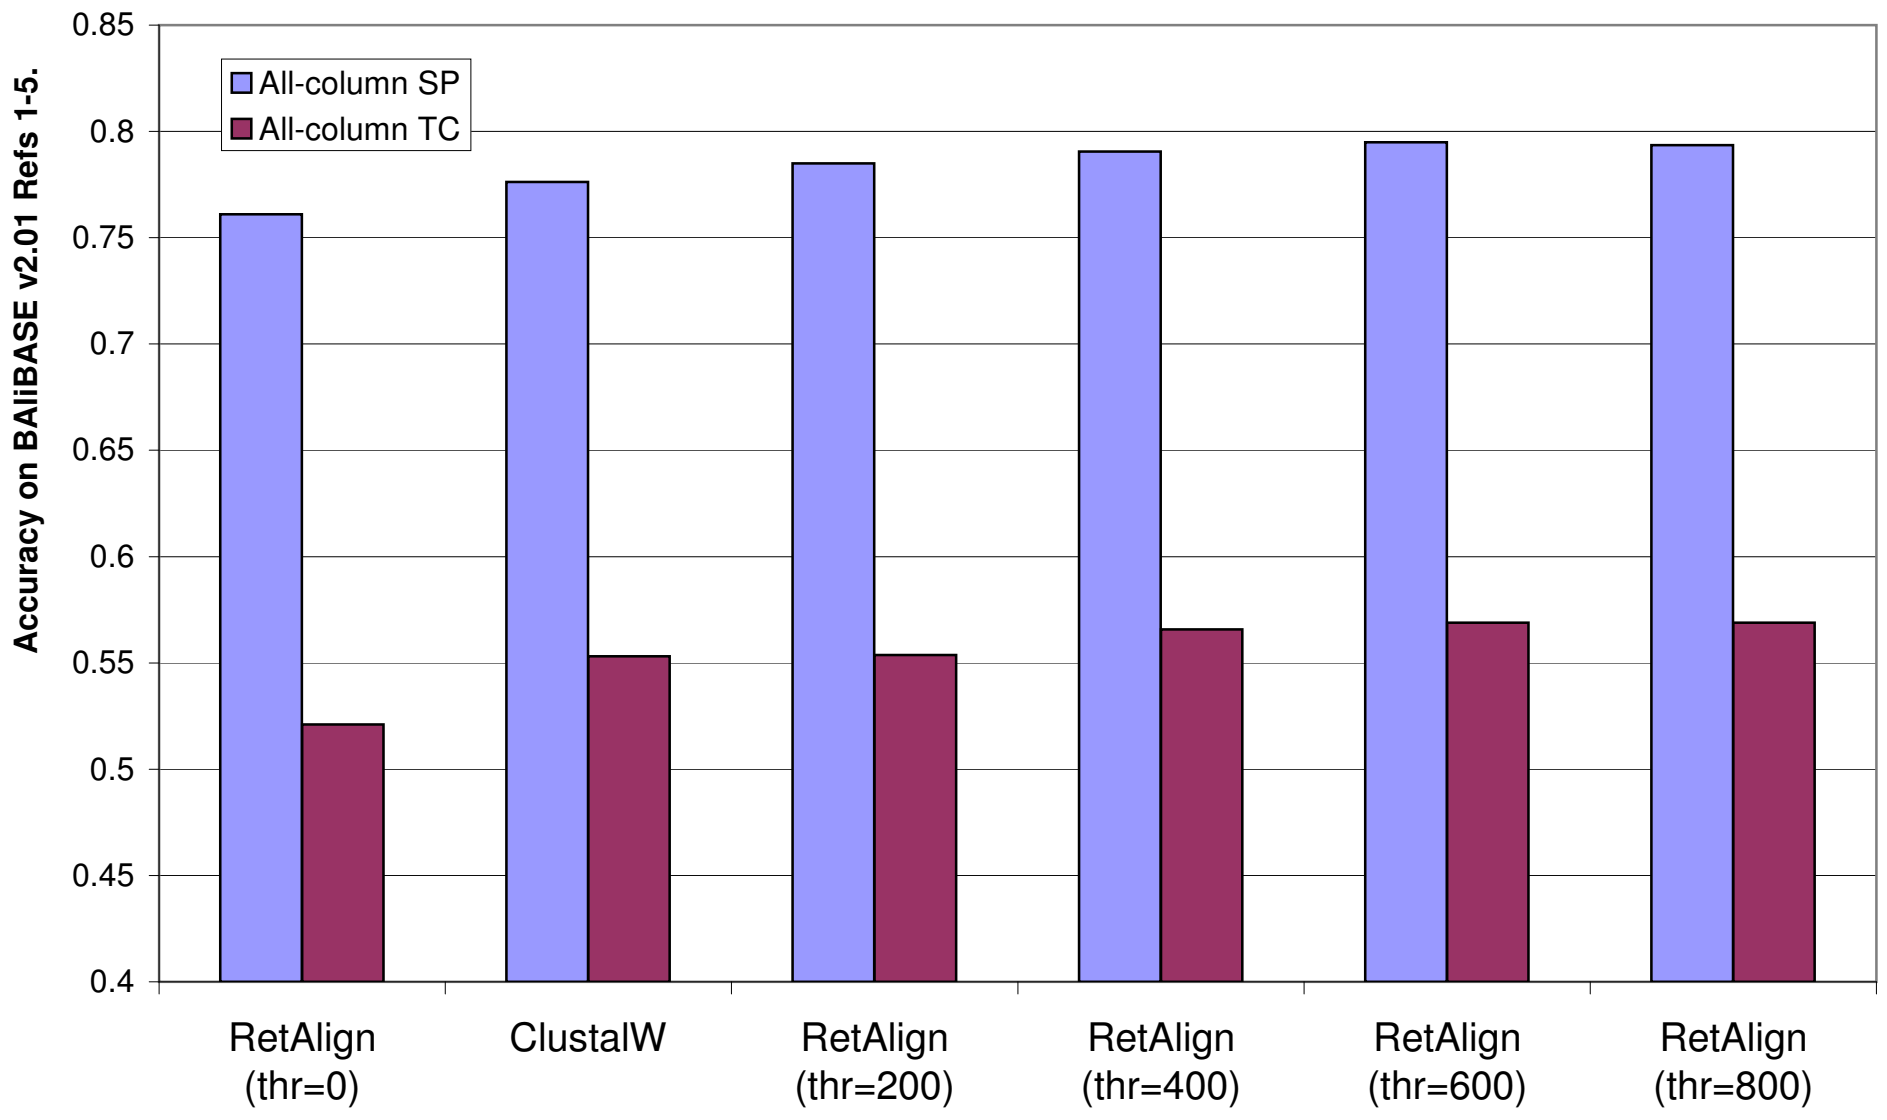

Supplement: 12859_2010_4153_MOESM8_ESM.pdf [file 12859_2010_4153_MOESM8_ESM.pdf]

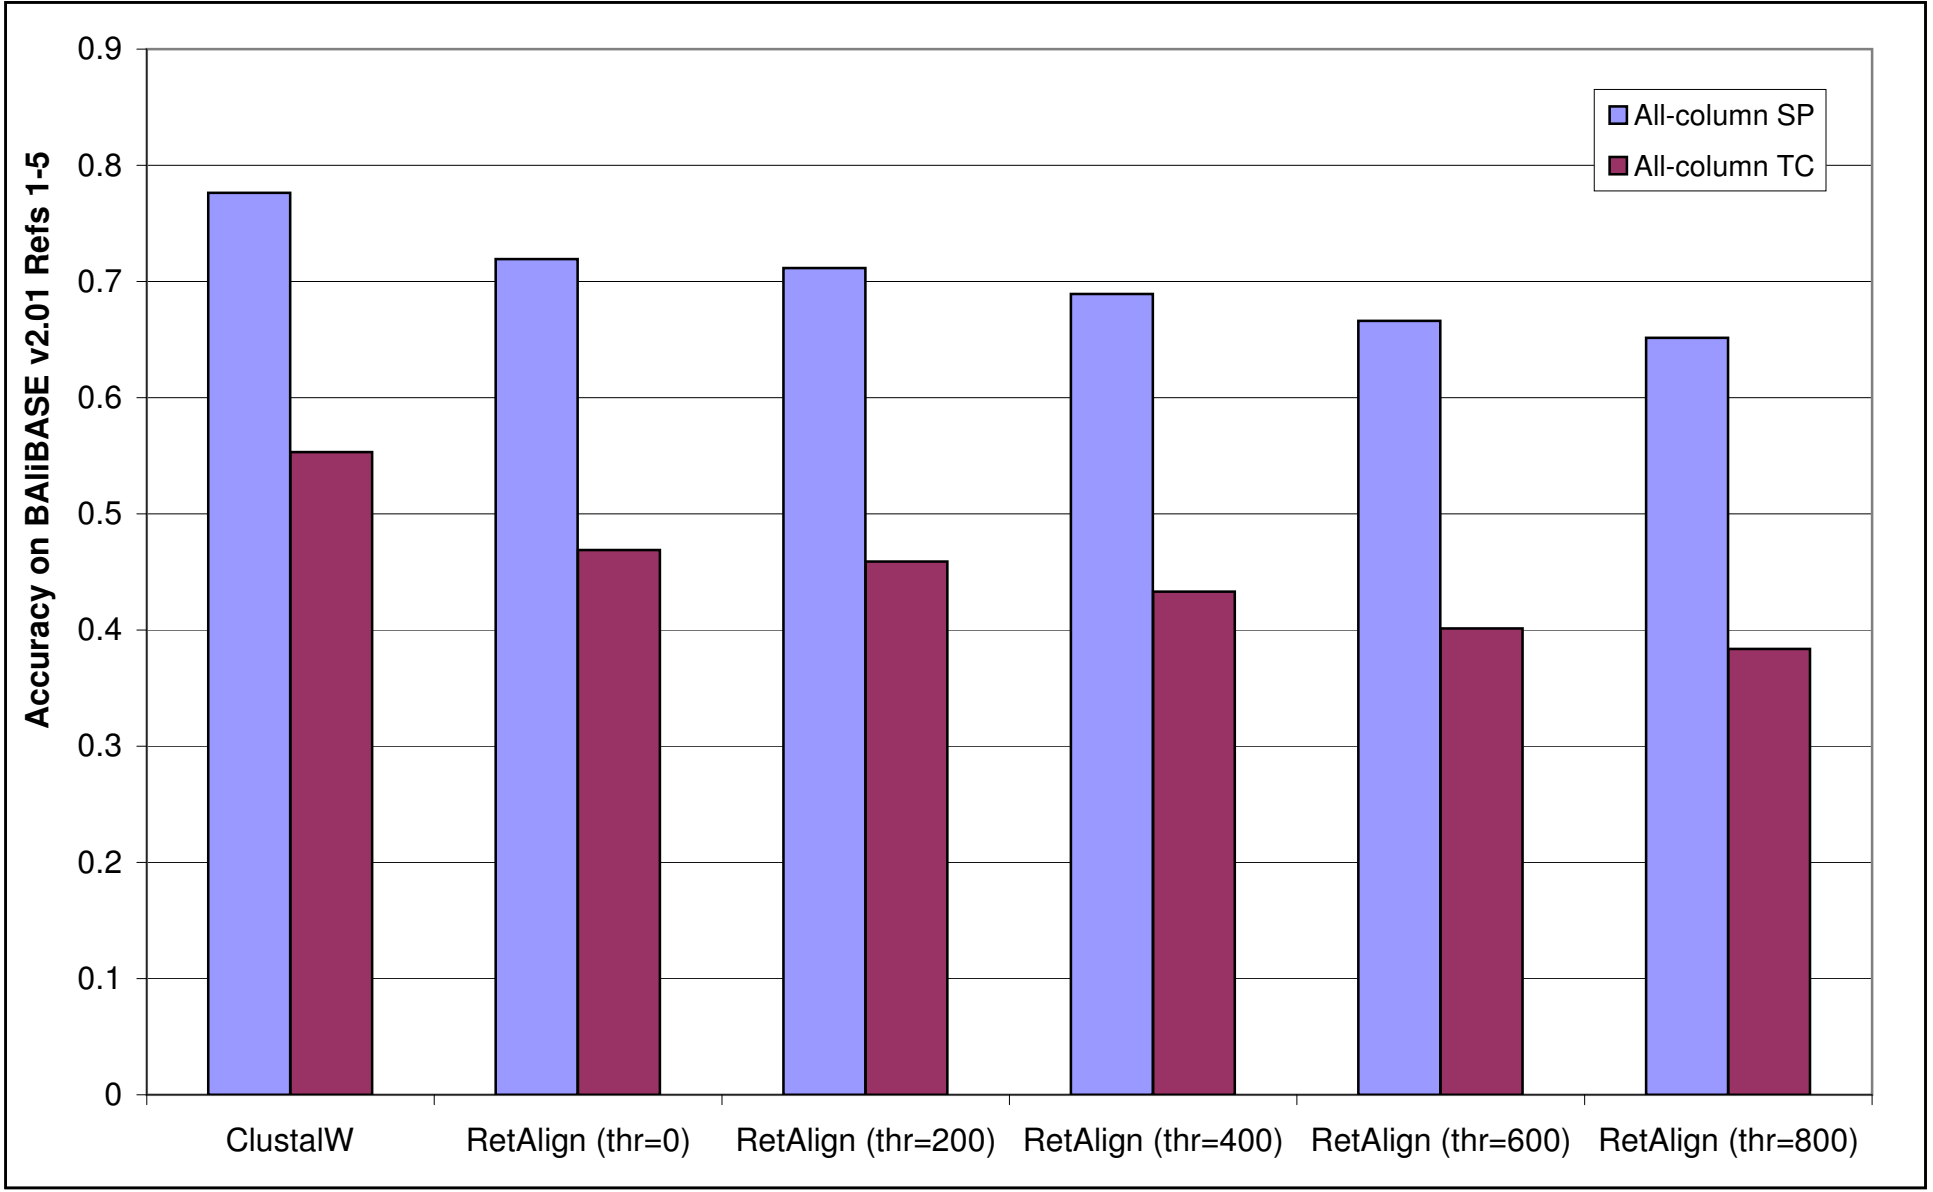

Supplement: 12859_2010_4153_MOESM9_ESM.pdf [file 12859_2010_4153_MOESM9_ESM.pdf]
